# Supplementary material
Source: Springer Nature journal article supplement (https://www.springermedizin.de/resource/supplementary/13633_2013_337_MOESM1_ESM.pdf/9596164)
Supplement: MOESM1 [file 9596164]

**Patients with suspected 46,XY CGD based on history and physical exam**

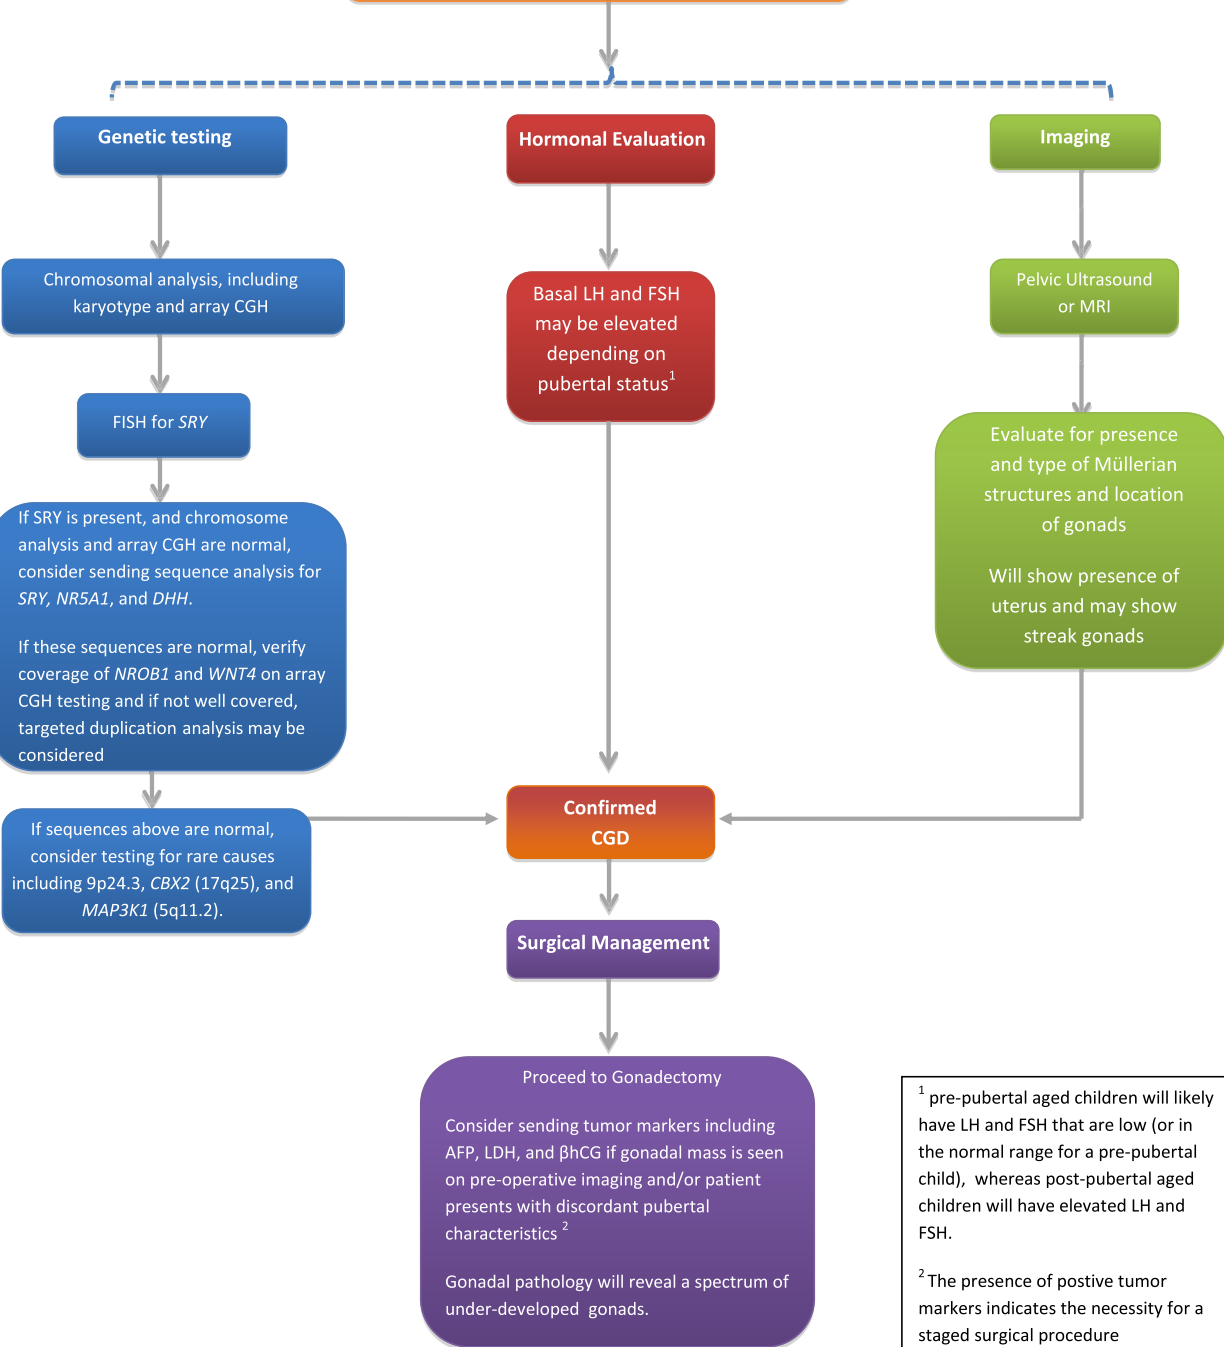

<sup>1</sup> pre-pubertal aged children will likely have LH and FSH that are low (or in the normal range for a pre-pubertal child), whereas post-pubertal aged children will have elevated LH and FSH.

<sup>2</sup> The presence of positive tumor markers indicates the necessity for a staged surgical procedure (laparotomy instead of laparoscopy).
